# Supplementary material for: Nanoscale Zinc Oxide Particles for Improving the Physiological and Sanitary Quality of a Mexican Landrace of Red Maize
Source: PubMed Central journal article supplement (PMC5923577; doi:10.3390/nano8040247), 2018-04-17
Supplement: nanomaterials-08-00247-s001.pdf [file nanomaterials-08-00247-s001.pdf]

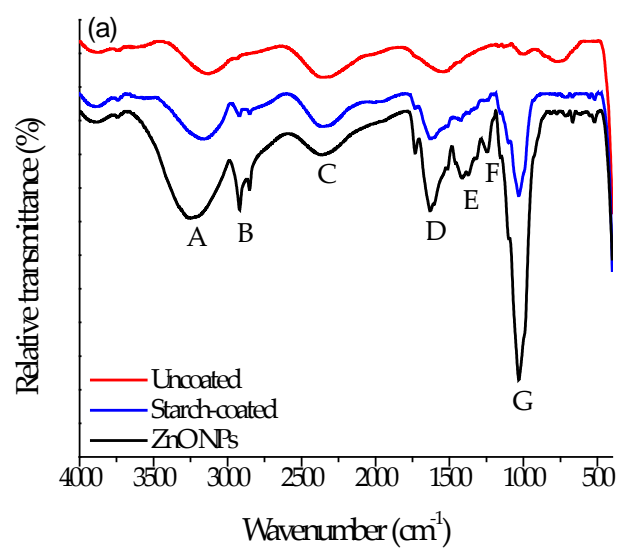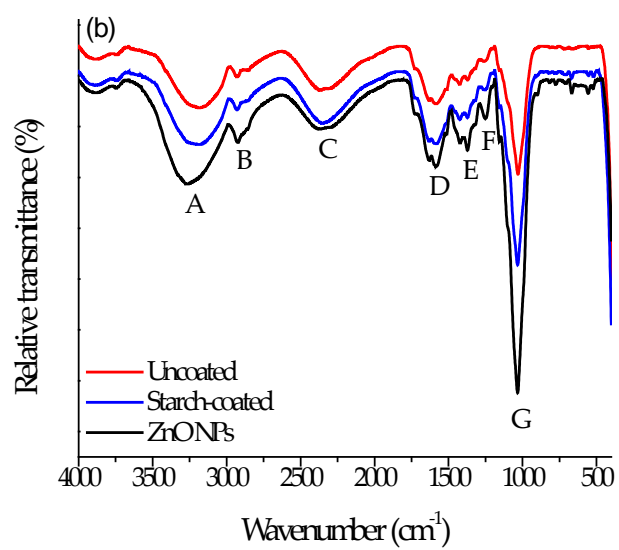

**Figure S1.** Comparative FTIR spectra of (a) maize seedling shoot, and (b) root tissues.
